# Supplementary material
Source: MDPI journal article supplement (https://www.mdpi.com/2073-4352/11/3/236)
Supplement: s1 [file s1]

Supporting Information for Crystals

Synthesis, Photophysical, and Computational Studies of a  
Bridged Ir<sup>III</sup>-Pt<sup>II</sup> Heterodimetallic Complex

*Si-Hai Wu*<sup>1,\*</sup>, *Dian-Xue Ma*<sup>2</sup>, *Zhong-Liang Gong*<sup>2</sup>, *Junjie Ma*<sup>1</sup>, *Jiang-Yang Shao*<sup>2,\*</sup>,

*Rong Yang*<sup>1</sup>, and *Yu-Wu Zhong*<sup>2,3,\*</sup>

<sup>1</sup> School of Medicine, Huaqiao University, Quanzhou, Fujian 362021, China

<sup>2</sup> Beijing National Laboratory for Molecular Sciences, CAS Key Laboratory of Photochemistry, CAS Research/Education Center for Excellence in Molecular Sciences, Institute of Chemistry, Chinese Academy of Sciences, Beijing 100190, China

<sup>3</sup> School of Chemical Sciences, University of Chinese Academy of Sciences, Beijing 100049, China

\* Correspondence: wusihai@hqu.edu.cn (S.-H.W.); shaojiangyang@iccas.ac.cn (J.-Y.S.); zhongyuwu@iccas.ac.cn (Y.-W.Z.)

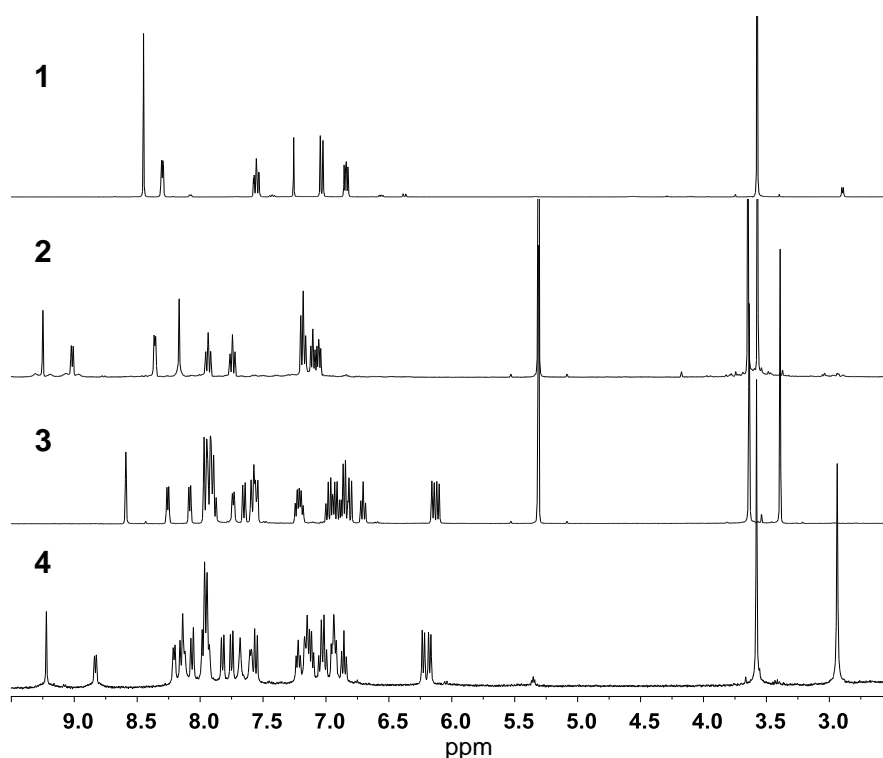

**Figure S1.** The comparison of  $^1\text{H}$  NMR spectra of **1**–**4**. The peak at around 5.3 ppm is from the solvent residue.

HPLC grade solvents were obtained from Fisher Scientific. A Shim-pack XR-ODS (Shimadzu, Japan) column (2.2  $\mu\text{m}$ , 75 mm  $\times$  4.6 mm, i.d.) was used for analysis. Figure S2 shows the chromatogram of ligand dapz and complex **4**. Compounds were eluted with a  $\text{CH}_3\text{CN}$  gradient in water (10–90% over 0–10 min, followed by isocratic elution of 90%  $\text{CH}_3\text{CN}$  for 5 min). All solvents contain 0.1% TFA. The flow rate was 1.0 mL/min. The detection wavelengths were set at 360 nm and 380 nm for ligand **1** and complex **4**, respectively. Integration results indicated purity of greater than 99% for complex **4**.

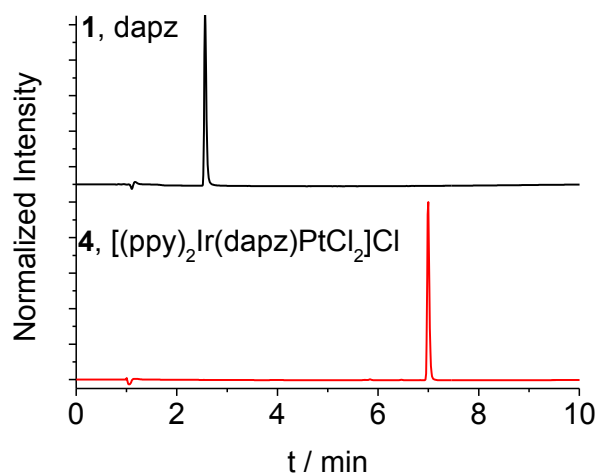

**Figure S2.** Analytical HPLC of ligand **1** (top) and complex **4**  $[(\text{ppy})_2\text{Ir}(\text{dapz})\text{PtCl}_2]\text{Cl}$  (bottom).

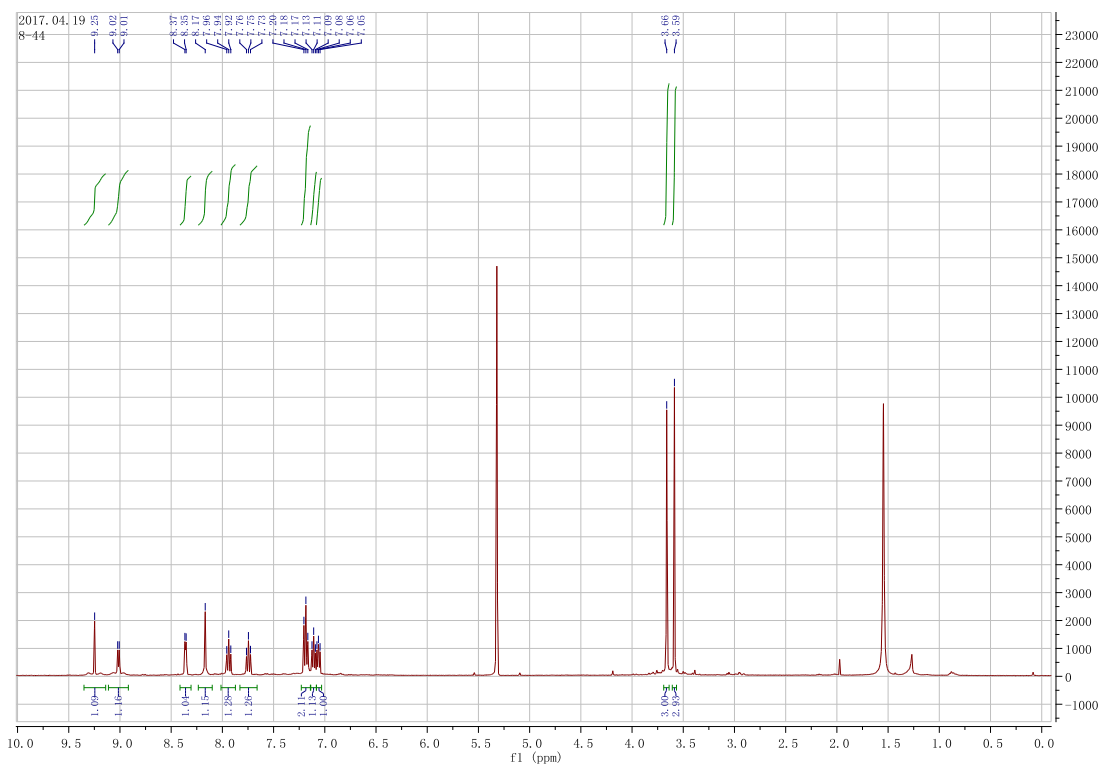

**Figure S3.**  $^1\text{H}$  NMR spectrum of complex **2** in  $\text{CD}_2\text{Cl}_2$ .

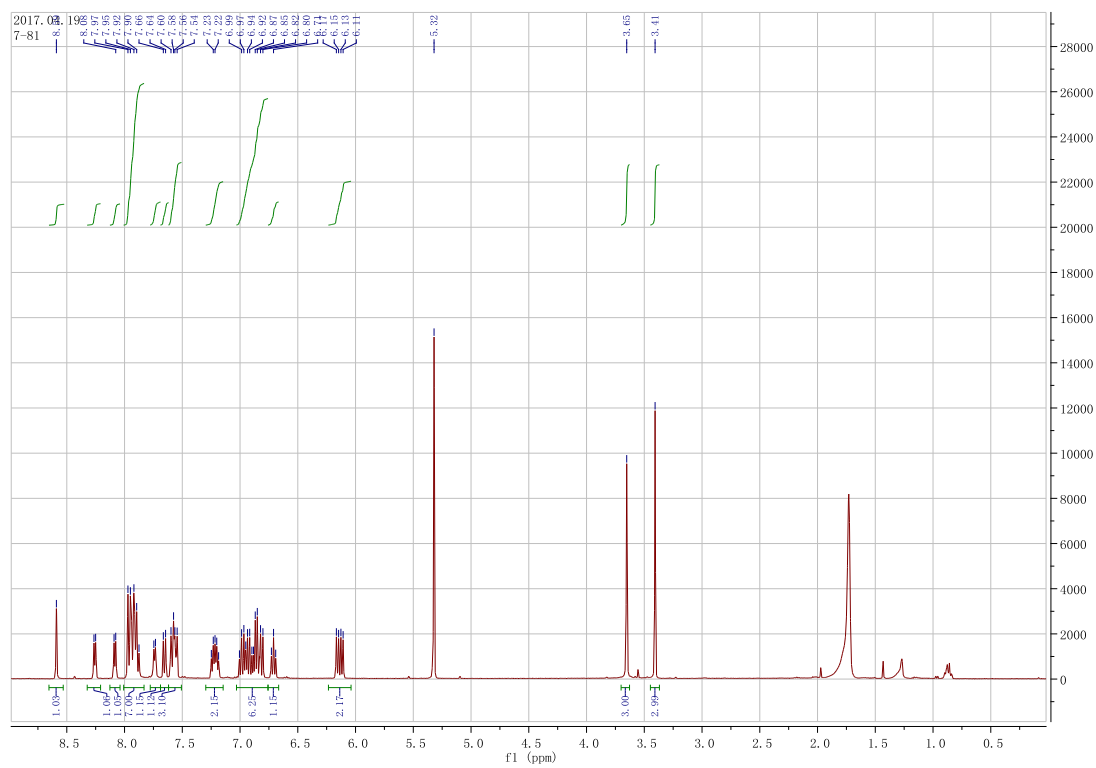

**Figure S4.**  $^1\text{H}$  NMR spectrum of complex **3** in  $\text{CD}_2\text{Cl}_2$ .

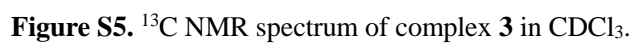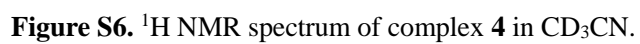

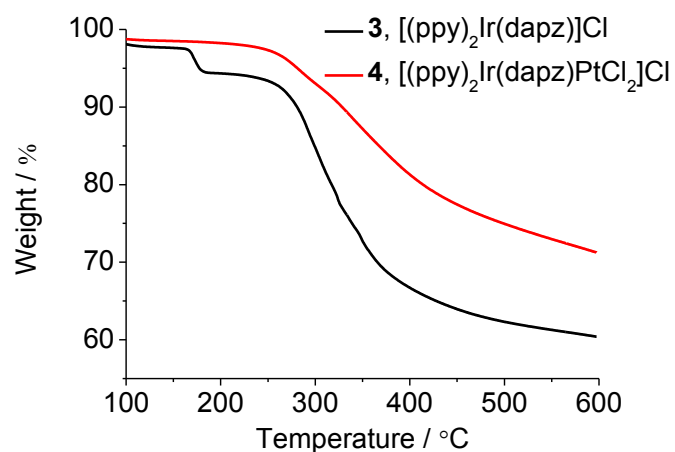

**Figure S7.** Thermogravimetric traces of complexes **3** (black) and **4** (red)

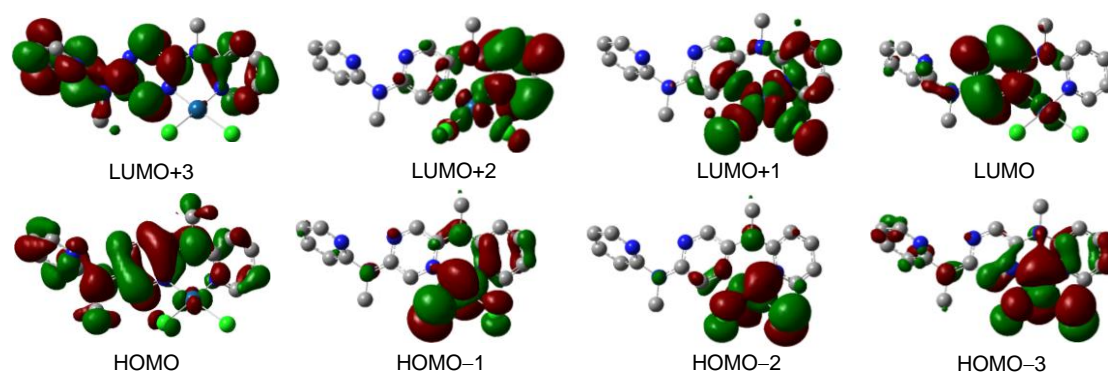

**Figure S8.** Isodensity plots of selected frontier molecular orbitals of complex **2**. All orbitals were computed at an isovalue of  $0.02 \text{ e bohr}^{-3}$ .

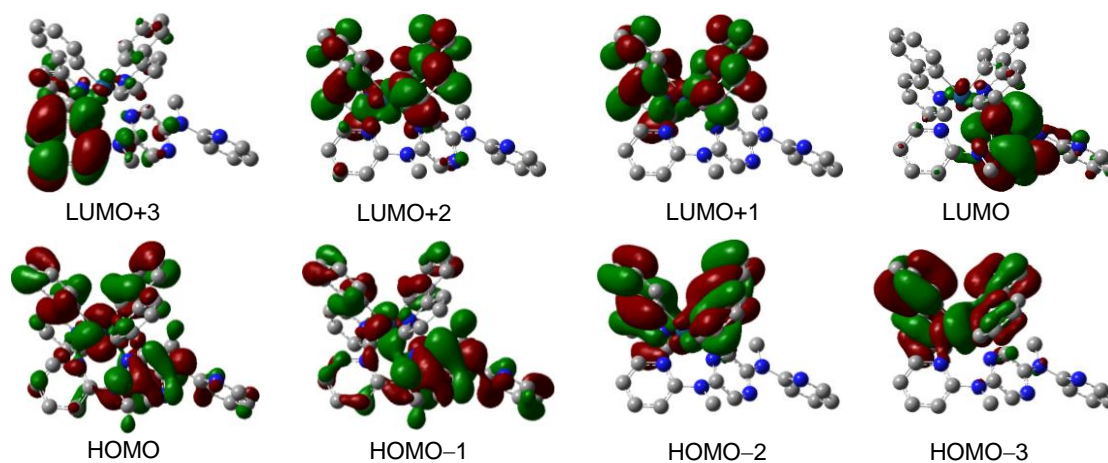

**Figure S9.** Isodensity plots of selected frontier molecular orbitals of complex **3<sup>+</sup>**. All orbitals were computed at an isovalue of  $0.02 \text{ e bohr}^{-3}$ .

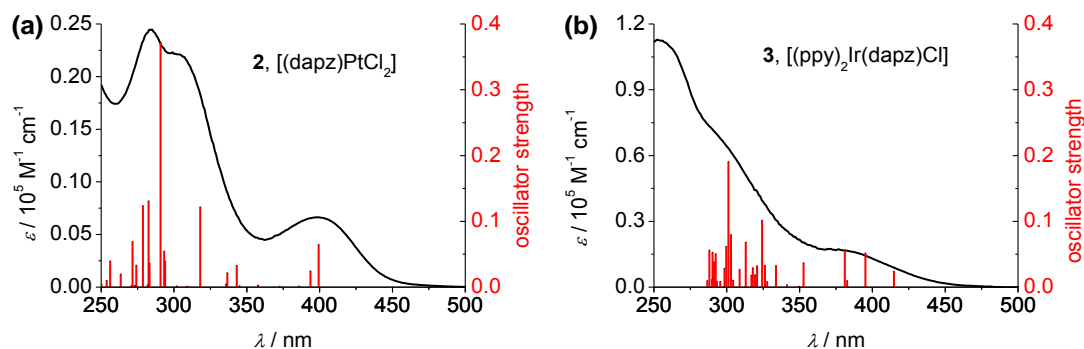

**Figure S10.** Absorption spectra in  $\text{CH}_3\text{CN}$  and TDDFT results of complex **2** (a) and **3**<sup>+</sup> (b).

The structure of **4** was solved using SHELXS-97 and refined with Olex2. The solvent-including crystal packing of **4** was shown in Figure S11. It is difficult to identify the solvent molecules because of its highly crystallographically disordered. The unit cell parameters of **4** keep constant when the disordered solvent molecules were removed. In comparison, after using squeeze, the intermolecular Pt $\cdots$ Pt distance (3.839 Å) keep constant while the intermolecular aromatic plane $\cdots$ plane (3.876 vs 3.886 Å) and Cl $\cdots$ Cl (4.250 vs 4.248 Å) distances display negligible changes due to the weak solute-solvent interactions. As suggested by Figure S11, the complex **4** was surrounded by the disordered solvent molecules. However, no significant effect was observed on crystal packing behavior of **4**.

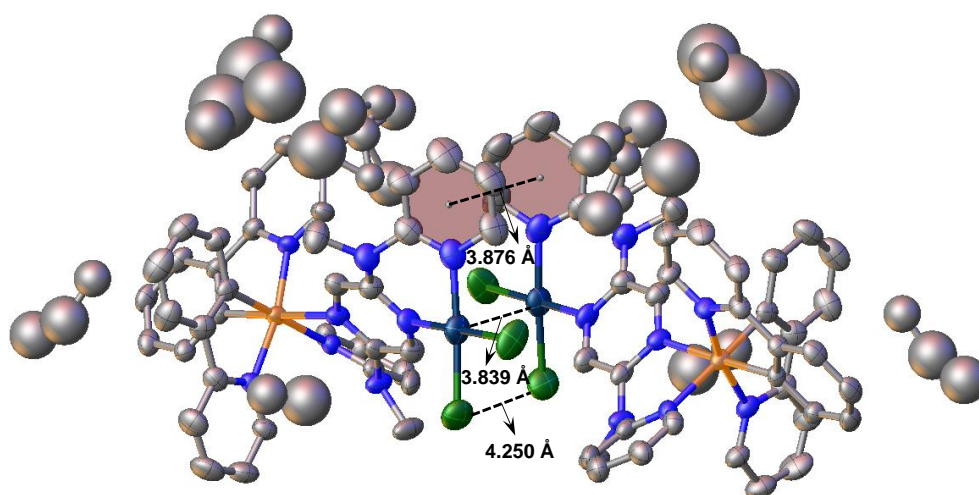

**Figure S11.** Solvent-including crystal packing of complex **4** with 50% probability of the thermal ellipsoids. For the reason of clarity, H atoms have been omitted. The intermolecular aromatic plane $\cdots$ plane, Pt $\cdots$ Pt and Cl $\cdots$ Cl distances are indicated in panel.

**Table S1.** Crystallographic data and parameters for complex **4**.

| Complex                                    | <b>4</b>                                                            |
|--------------------------------------------|---------------------------------------------------------------------|
| CCDC number                                | 1574637                                                             |
| empirical formula                          | C <sub>38</sub> H <sub>32</sub> Cl <sub>2</sub> IrN <sub>8</sub> Pt |
| formula weight                             | 1058.58                                                             |
| crystal system                             | monoclinic                                                          |
| a (Å)                                      | 13.0437(2)                                                          |
| b (Å)                                      | 24.3865(5)                                                          |
| c (Å)                                      | 28.8657(5)                                                          |
| V (Å <sup>3</sup> )                        | 8982.2(3)                                                           |
| α (°)                                      | 90                                                                  |
| β (°)                                      | 101.971(2)                                                          |
| γ (°)                                      | 90                                                                  |
| Z value                                    | 8                                                                   |
| Density (g/cm <sup>3</sup> )               | 1.566                                                               |
| Absorption coefficient (mm <sup>-1</sup> ) | 6.223                                                               |
| F(000)                                     | 4040                                                                |
| R1 (final)                                 | 0.0345                                                              |
| wR2 (final)                                | 0.0792                                                              |
| R1 (all)                                   | 0.0422                                                              |
| wR2 (all)                                  | 0.0826                                                              |

**Table S2.** Selected Bond Lengths and Bond Angles.

| Complex  | bond lengths (Å) |            | bond angles (°)   |           |
|----------|------------------|------------|-------------------|-----------|
| <b>4</b> | Pt(1)-Cl(1)      | 2.2968(13) | Cl(2)-Pt(1)-Cl(1) | 88.83(6)  |
|          | Pt(1)-Cl(2)      | 2.2934(17) | N(1)-Pt(1)-Cl(1)  | 92.36(12) |
|          | Pt(1)-N(1)       | 2.032(5)   | N(3)-Pt(1)-Cl(2)  | 90.84(12) |
|          | Pt(1)-N(3)       | 2.007(4)   | N(3)-Pt(1)-N(1)   | 87.95(16) |
|          | Ir(1)-N(4)       | 2.167(4)   | N(4)-Ir(1)-N(6)   | 85.94(14) |
|          | Ir(1)-N(6)       | 2.174(3)   | N(4)-Ir(1)-N(7)   | 89.57(13) |
|          | Ir(1)-N(7)       | 2.063(3)   | N(4)-Ir(1)-N(8)   | 97.80(14) |
|          | Ir(1)-N(8)       | 2.055(3)   | C(27)-Ir(1)-N(7)  | 80.63(16) |
|          | Ir(1)-C(27)      | 2.019(4)   | C(38)-Ir(1)-N(8)  | 80.44(15) |
|          | Ir(1)-C(38)      | 2.019(4)   | N(4)-Ir(1)-N(7)   | 89.57(13) |
